# Supplementary material for: Heterogeneous fullerene-supported osmium tetroxide catalyst for the cis-dihydroxylation of olefins
Source: Royal Society of Chemistry journal article supplement (doi:10.1039/c0dt00599a), 2010-01-01
Supplement: c0dt00599a.pdf [file c0dt00599a.pdf]

*Supporting Information*

## **Heterogeneous Fullerene-Supported Osmium Tetroxide Catalyst for the *cis*-Dihydroxylation of Olefins**

Laura L. Lazarus and Richard L. Brutchey\*

*Department of Chemistry, University of Southern California, Los Angeles, California  
90089*

### **Materials and Methods.**

Fullerene-C<sub>60</sub> (99.5%), cyclohexene (99%), 1-hexene ( $\geq 99.8\%$ ), styrene (99.9%),  $\alpha$ -methylstyrene (99%); and GC standards: *cis*-1, 2-cyclohexanediol (99%), 1,2-hexanediol (98%), 1-phenyl-1, 2-ethanediol (97%), 2-phenyl-1,2-propanediol (97%), and dodecane ( $\geq 99.8\%$ ) were purchased from Sigma-Aldrich and used without further purification. Osmium tetroxide (Pressure Chemical Co. (Pittsburgh, PA)), multi-walled carbon nanotubes (<95%; Cheaptubes.com (Brattleboro, VT)), and pyridine ( $\geq 99\%$ ; Alfa Aesar), were also used as received. Single-walled carbon nanotubes (HiPCO) were donated by Dr. Mark Thompson (University of Southern California) and purified via a standard acid purification and annealing procedure.<sup>1</sup>

EDX data were collected using a JEOL JSM-6610 scanning electron microscope operating at 20 kV and equipped with an EDAX Apollo silicon drift detector. XPS spectra were measured on a M-Probe Surface Spectrometer by Surface Science (ESCA2703, Al monochromator with charging compensation). FT-IR (KBr) spectra were collected on a Perkin Elmer Spectrum 2000 FT-IR spectrometer. GC data were collected using a 7890A GC System (Agilent Technologies) outfitted with an HP-5 column (J&W Scientific). Dodecane was used as an internal standard and all samples were run in dichloromethane (40 °C for 2 min then ramp to 200 °C at 40 °C/min, hold 2 min). BET surface area was measured with a NOVA2200e Surface Area and Pore Size Analyzer (Quantachrome Instruments). UV-vis spectra were collected with a Shimadzu UV spectrophotometer (UV-1800).

### **Osmylation of C<sub>60</sub>.**

**(WARNING:** Osmium tetroxide is extremely toxic and should only be handled in the fume hood using appropriate safety precautions). The 1:2 adduct, C<sub>60</sub> (OsO<sub>4</sub>)<sub>2</sub>·4pyridine, was prepared according to a literature procedure.<sup>2</sup> Briefly, C<sub>60</sub> (100 mg, 0.14 mmol) was dissolved in toluene (60 mL) by brief sonication and vigorous stirring to give a bright purple solution. A solution of OsO<sub>4</sub> (71 mg, 0.28 mmol) and pyridine (55  $\mu$ L, 0.70 mmol) in approximately 5 mL of toluene was then added drop-wise to the C<sub>60</sub> solution, which immediately turned brick-red and opaque. The reaction suspension was stirred at 25 °C for 24 h and the resulting solid was separated by centrifugation and washed several times with toluene.

IR (KBr): cm<sup>-1</sup> 1608 (m), 1481 (w), 1450 (s), 1213 (w), 1069 (w), 971 (m), 876 (w), 836 (s), 762 (m), 691 (m), 618 (m), 526 (w).

### Osmylation of Single- and Multi-walled Carbon Nanotubes.

Both single and multi-walled carbon nanotubes were osmylated according to a literature procedure<sup>3</sup> with slight modifications made. First, pyridine (2.2 mmol per mmol of Os used) was added to the reaction mixture in a 250 mL quartz flask prior to irradiation in the photoreactor ( $\lambda = 254$  nm, Luzchem Model: LZC-ICH2). Secondly, a range of wt% loadings of Os was evaluated (5-1000 wt%) giving an expected linear increase in the amount of Os detected by XPS in the osmylated tubes.

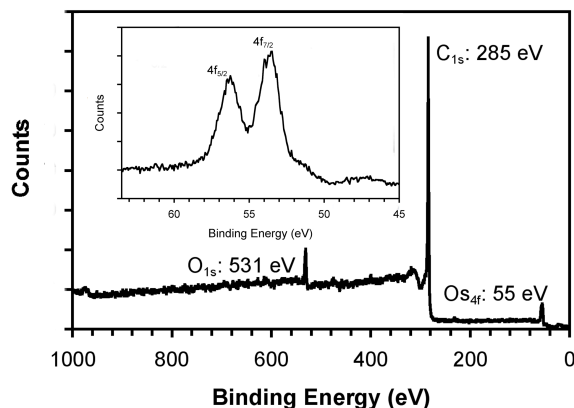

**Fig. S1** XPS spectrum of CNT-Os(VI) pre-catalyst; Inset: hi-res scan of Os<sub>4f</sub> doublet.

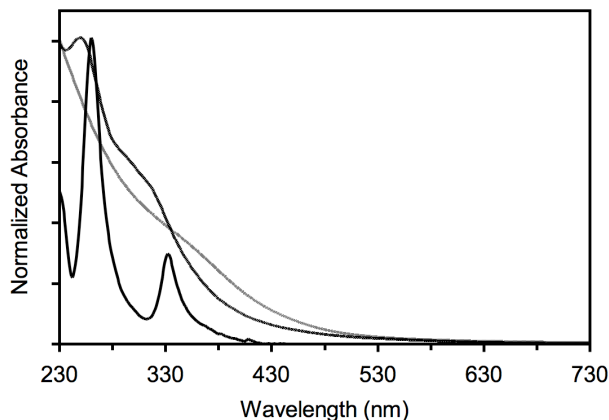

**Fig. S2** UV-vis spectra of C<sub>60</sub> (black) and C<sub>60</sub>(OsO<sub>4</sub>)<sub>2</sub>·4pyridine pre-catalyst (dark gray), both in DCM. After several catalytic runs, the spectrum of the recovered catalyst (light gray) was taken in DI water due to solubility issues.

- (1) J. L. Bahr and J. M. Tour, *Chem. Mater.*, 2001, **13**, 3823.
- (2) J. M. Hawkins, A. Meyer, T. A. Lewis, S. Loren and F. J. Hollander, *Science*, 1991, **252**, 312.
- (3) S. Banerjee and S. S. Wong, *J. Am. Chem. Soc.*, 2004, **126**, 2073.
